# Supplementary material for: MARCH8 inhibits viral infection by two different mechanisms
Source: eLife journal article supplement (doi:10.7554/elife.57763), 2020-08-10

## Source data

### **MARCH8 inhibits viral infection by two different mechanisms**

Yanzhao Zhang, Takuya Tada, Seiya Ozono, Satoshi Kishigami,  
Hideaki Fujita, and Kenzo Tokunaga

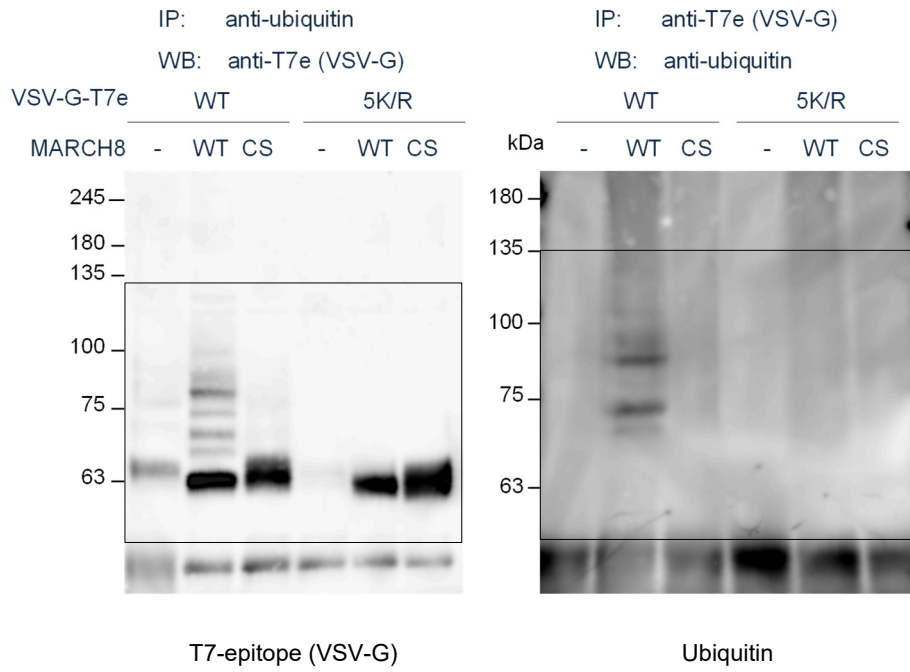

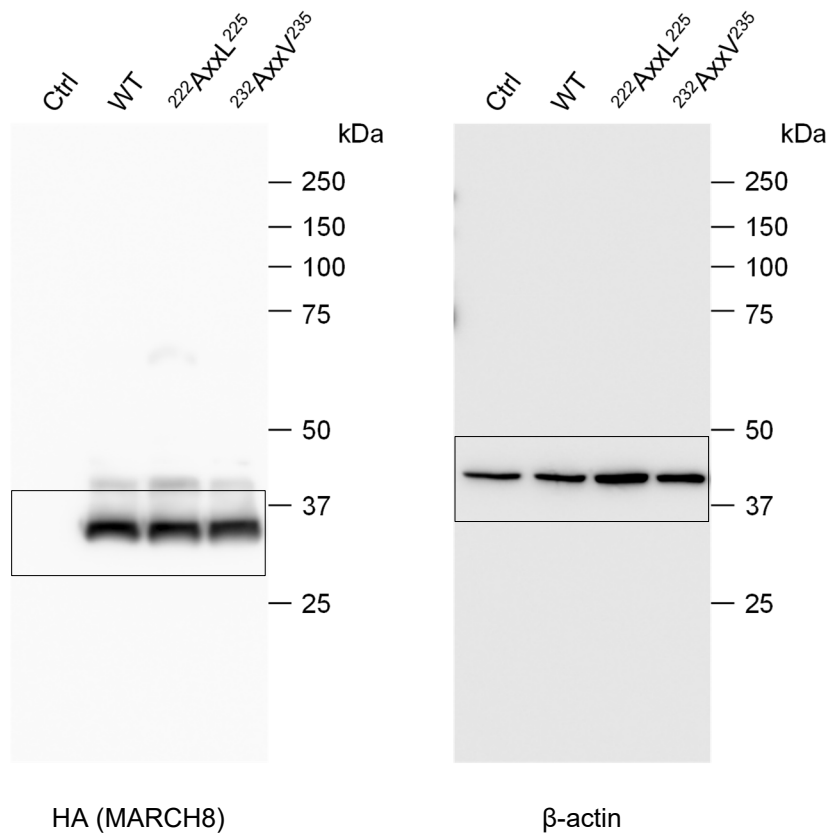

Supplement: data2 [file elife-57763-data2-v1.pdf]
