# Supplementary material for: MARCH8 inhibits viral infection by two different mechanisms
Source: eLife. 2020 Aug 11;9:e57763. doi: 10.7554/eLife.57763 (PMC7419139; doi:10.7554/eLife.57763)
Supplement: Source data 1. [file elife-57763-data1.xlsx]

## Sheet: Sheet1
	Fig. 1B
	RLU		VSV-G				% infectivity of Ctrl viruses
		WT		5K/R				WT		5K/R
	Firefly luc	Ctrl	+MARCH8	Ctrl	+MARCH8		Firefly luc	Ctrl	+MARCH8	Ctrl	+MARCH8
	#1	970403	50977	1304603	1331642		#1	95.2246	5.00232	99.689	101.755
	#2	1046836	61417	1298510	1191582		#2	102.725	6.02678	99.2234	91.0527
	#3	1039965	50381	1322907	1199626		#3	102.051	4.94383	101.088	91.6674
	Fig. 1C
	RLU		HIV-1 Env				% infectivity of Ctrl viruses
		WT		5K/R				WT		5K/R
	Firefly luc	Ctrl	+MARCH8	Ctrl	+MARCH8		Firefly luc	Ctrl	+MARCH8	Ctrl	+MARCH8
	#1	92180	9803	78362	6369		#1	87.3347	9.28772	85.3217	6.93466
	#2	119335	10353	99217	7948		#2	113.062	9.80881	108.029	8.6539
	#3	105148	10573	97951	7260		#3	99.621	10.0172	106.65	7.90479
	Fig. 2C
	RLU		VSV-G				% infectivity of Ctrl viruses
	Firefly luc	Ctrl	WT	AxxL	AxxV		Firefly luc	Ctrl	WT	AxxL	AxxV
	#1	316455	280	15499	507		#1	95.2621	0.0842881	4.66565	0.152622
	#2	329512	132	15262	453		#2	99.1926	0.0397358	4.5943	0.136366
	#3	350614	40	17999	153		#3	105.545	0.0120412	5.41822	0.0460574
	Fig. 2D
	RLU		HIV-1 Env				% infectivity of Ctrl viruses
	Firefly luc	Ctrl	WT	AxxL	AxxV		Firefly luc	Ctrl	WT	AxxL	AxxV
	#1	63237	7420	53126	4686		#1	96.7311	11.3501	81.2647	7.16799
	#2	67401	6979	63175	6015		#2	103.101	10.6755	96.6363	9.20091
	#3	65485	6756	54370	4135		#3	100.17	10.3344	83.1676	6.32514
	Fig. 2I										gp120/p24 ratio					% gp120 Env/p24 Gag in the supernatants relative to that from control cells
	gp120 ng/ml	Ctrl	WT	AxxL		p24 ng/ml	Ctrl	WT	AxxL			Ctrl	WT	AxxL			Ctrl	WT	AxxL
	#1	20.3	1.2855	10.1		#1	118	66.9	61.5		#1	0.172034	0.0192152	0.164228		#1	100	11.1694	95.4624
	#2	9.97615	1.60922	10.1116		#2	30.3988	55.4653	43.5492		#2	0.328176	0.0290131	0.232188		#2	100	8.84071	70.7509
	#3	7.28248	1.05243	6.30433		#3	35.0804	54.422	42.4812		#3	0.207594	0.0193383	0.148403		#3	100	9.31547	71.4872
	All numbers represent biological replicates from three independent experiments
